# Supplementary material for: Similarly Lethal Strains of Extraintestinal Pathogenic Escherichia coli Trigger Markedly Diverse Host Responses in a Zebrafish Model of Sepsis
Source: PubMed Central journal article supplement (PMC4894679; doi:10.1128/msphere.00062-16), 2016-04-20
Supplement: sph002162069sf4.pdf [file sph002162069sf4.pdf]

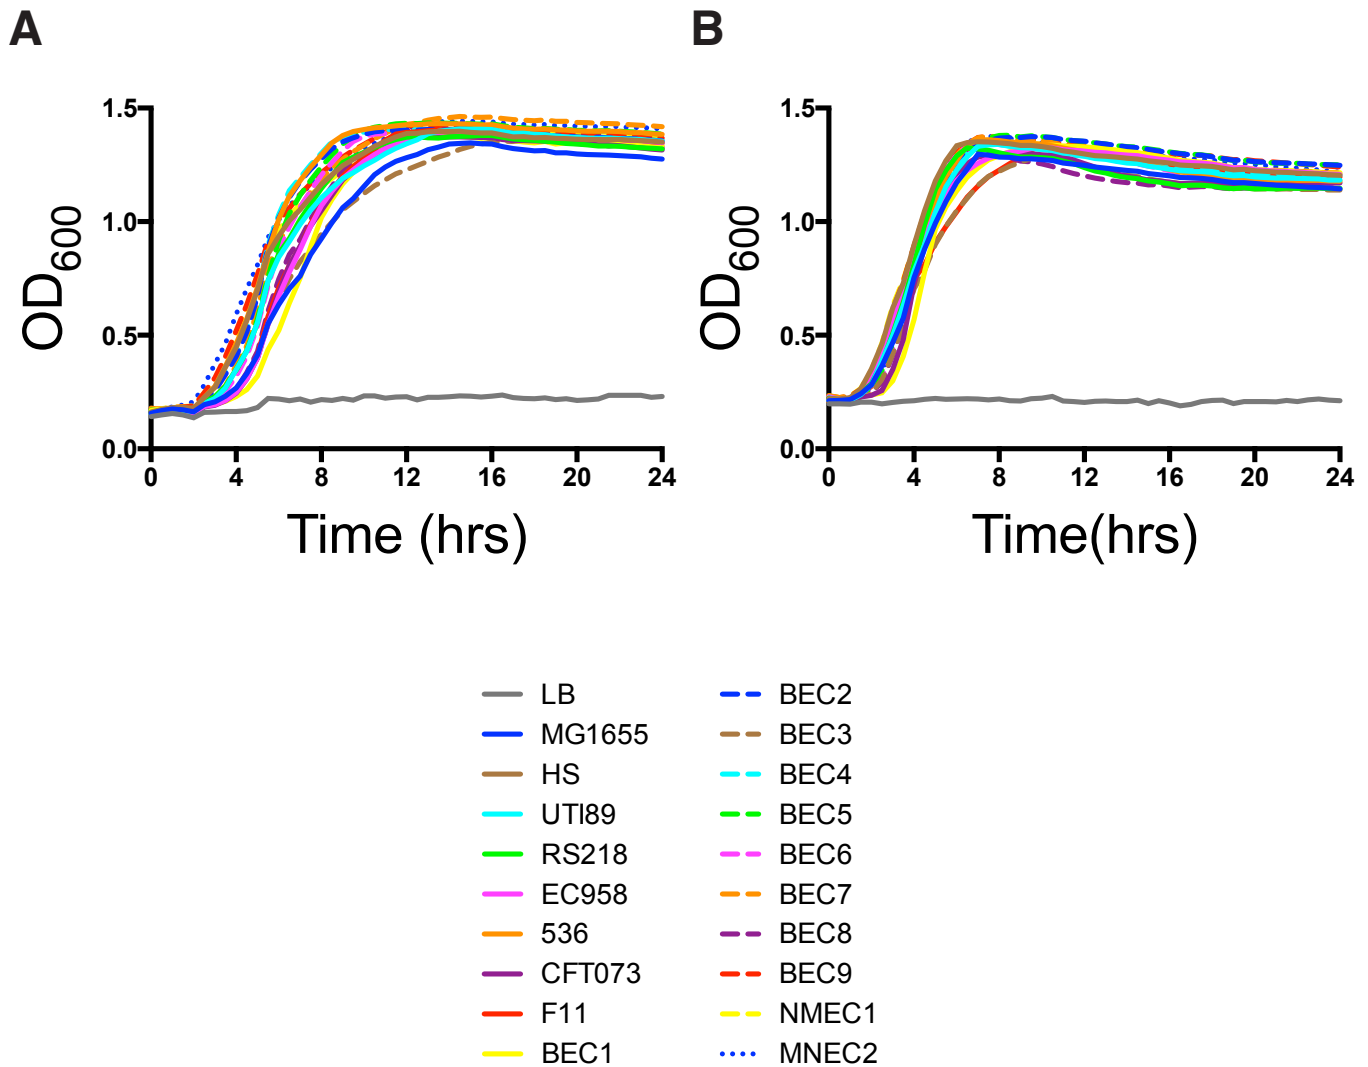

**Supplemental Figure S1. Similar growth rates of *E. coli* strains in broth culture.** (A-B) Representative data showing that all strains tested share similar growth kinetics in LB broth at 28.5°C (A) and 37°C (B). Each graph is representative of three independent experiments performed in quadruplicate.
