# Supplementary material for: Similarly Lethal Strains of Extraintestinal Pathogenic Escherichia coli Trigger Markedly Diverse Host Responses in a Zebrafish Model of Sepsis
Source: PubMed Central journal article supplement (PMC4894679; doi:10.1128/msphere.00062-16), 2016-04-20
Supplement: sph002162069sf5.pdf [file sph002162069sf5.pdf]

**A**

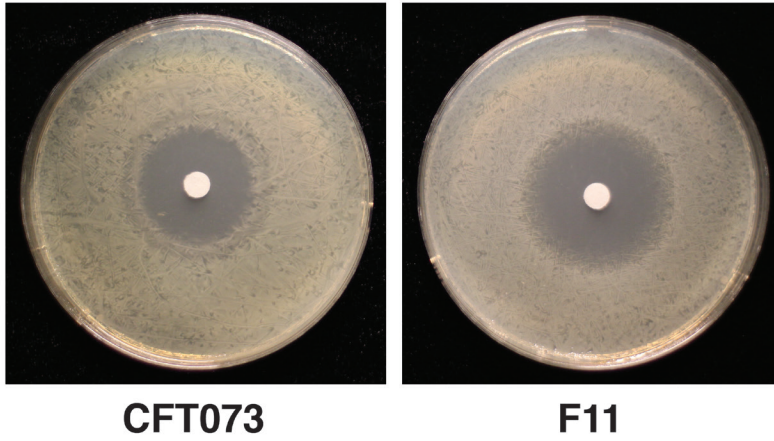

**B**

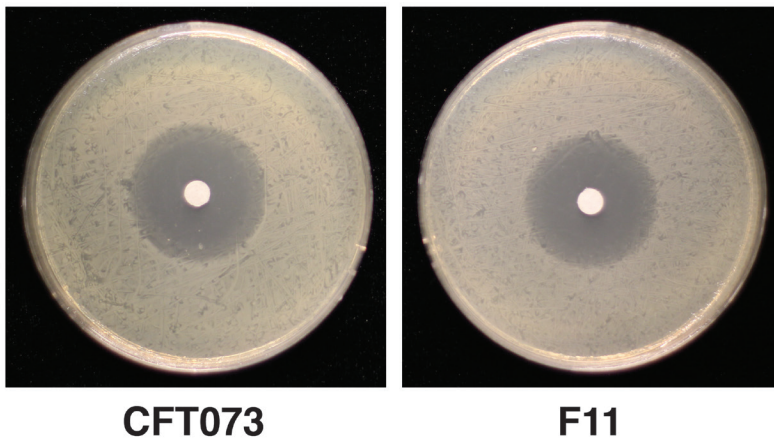

**Supplemental Figure S2. CFT073 and F11 are similarly sensitive to ciprofloxacin *in vitro*.**

**(A and B)** Representative images of ciprofloxacin disc diffusion assays on LB plates incubated overnight at 28.5°C (**A**) or 37°C (**B**). Each disc contains 5  $\mu$ g ciprofloxacin.
