# Supplementary material for: Similarly Lethal Strains of Extraintestinal Pathogenic Escherichia coli Trigger Markedly Diverse Host Responses in a Zebrafish Model of Sepsis
Source: PubMed Central journal article supplement (PMC4894679; doi:10.1128/msphere.00062-16), 2016-04-20
Supplement: sph002162069sf6.pdf [file sph002162069sf6.pdf]

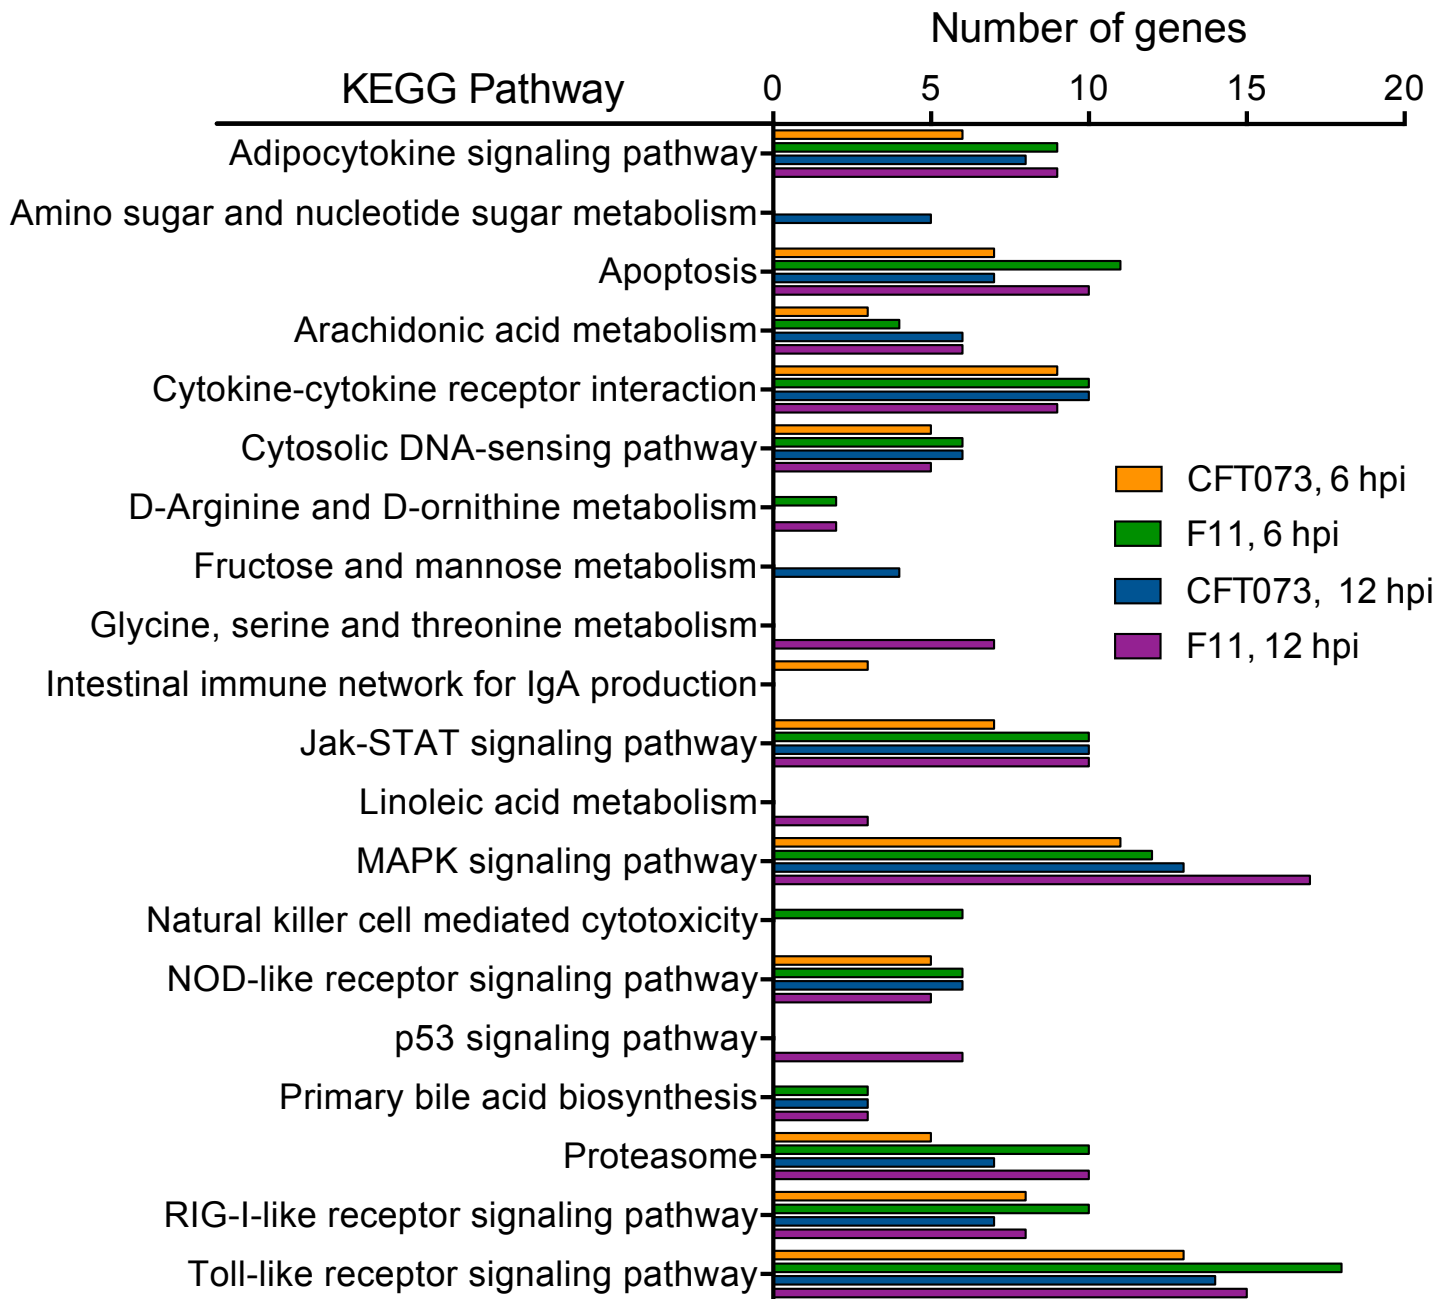

**Supplemental Figure S3. CFT073 and F11 have differential effects on host biological pathways.** Quantification of differentially expressed genes (fold change  $\geq 2$ ,  $P \leq 0.05$ ) within KEGG pathways that are affected in response to systemic infections of zebrafish embryos with CFT073 and/or F11, as determined by DAVID.
