# Supplementary material for: Similarly Lethal Strains of Extraintestinal Pathogenic Escherichia coli Trigger Markedly Diverse Host Responses in a Zebrafish Model of Sepsis
Source: PubMed Central journal article supplement (PMC4894679; doi:10.1128/msphere.00062-16), 2016-04-20
Supplement: sph002162069sf8.pdf [file sph002162069sf8.pdf]

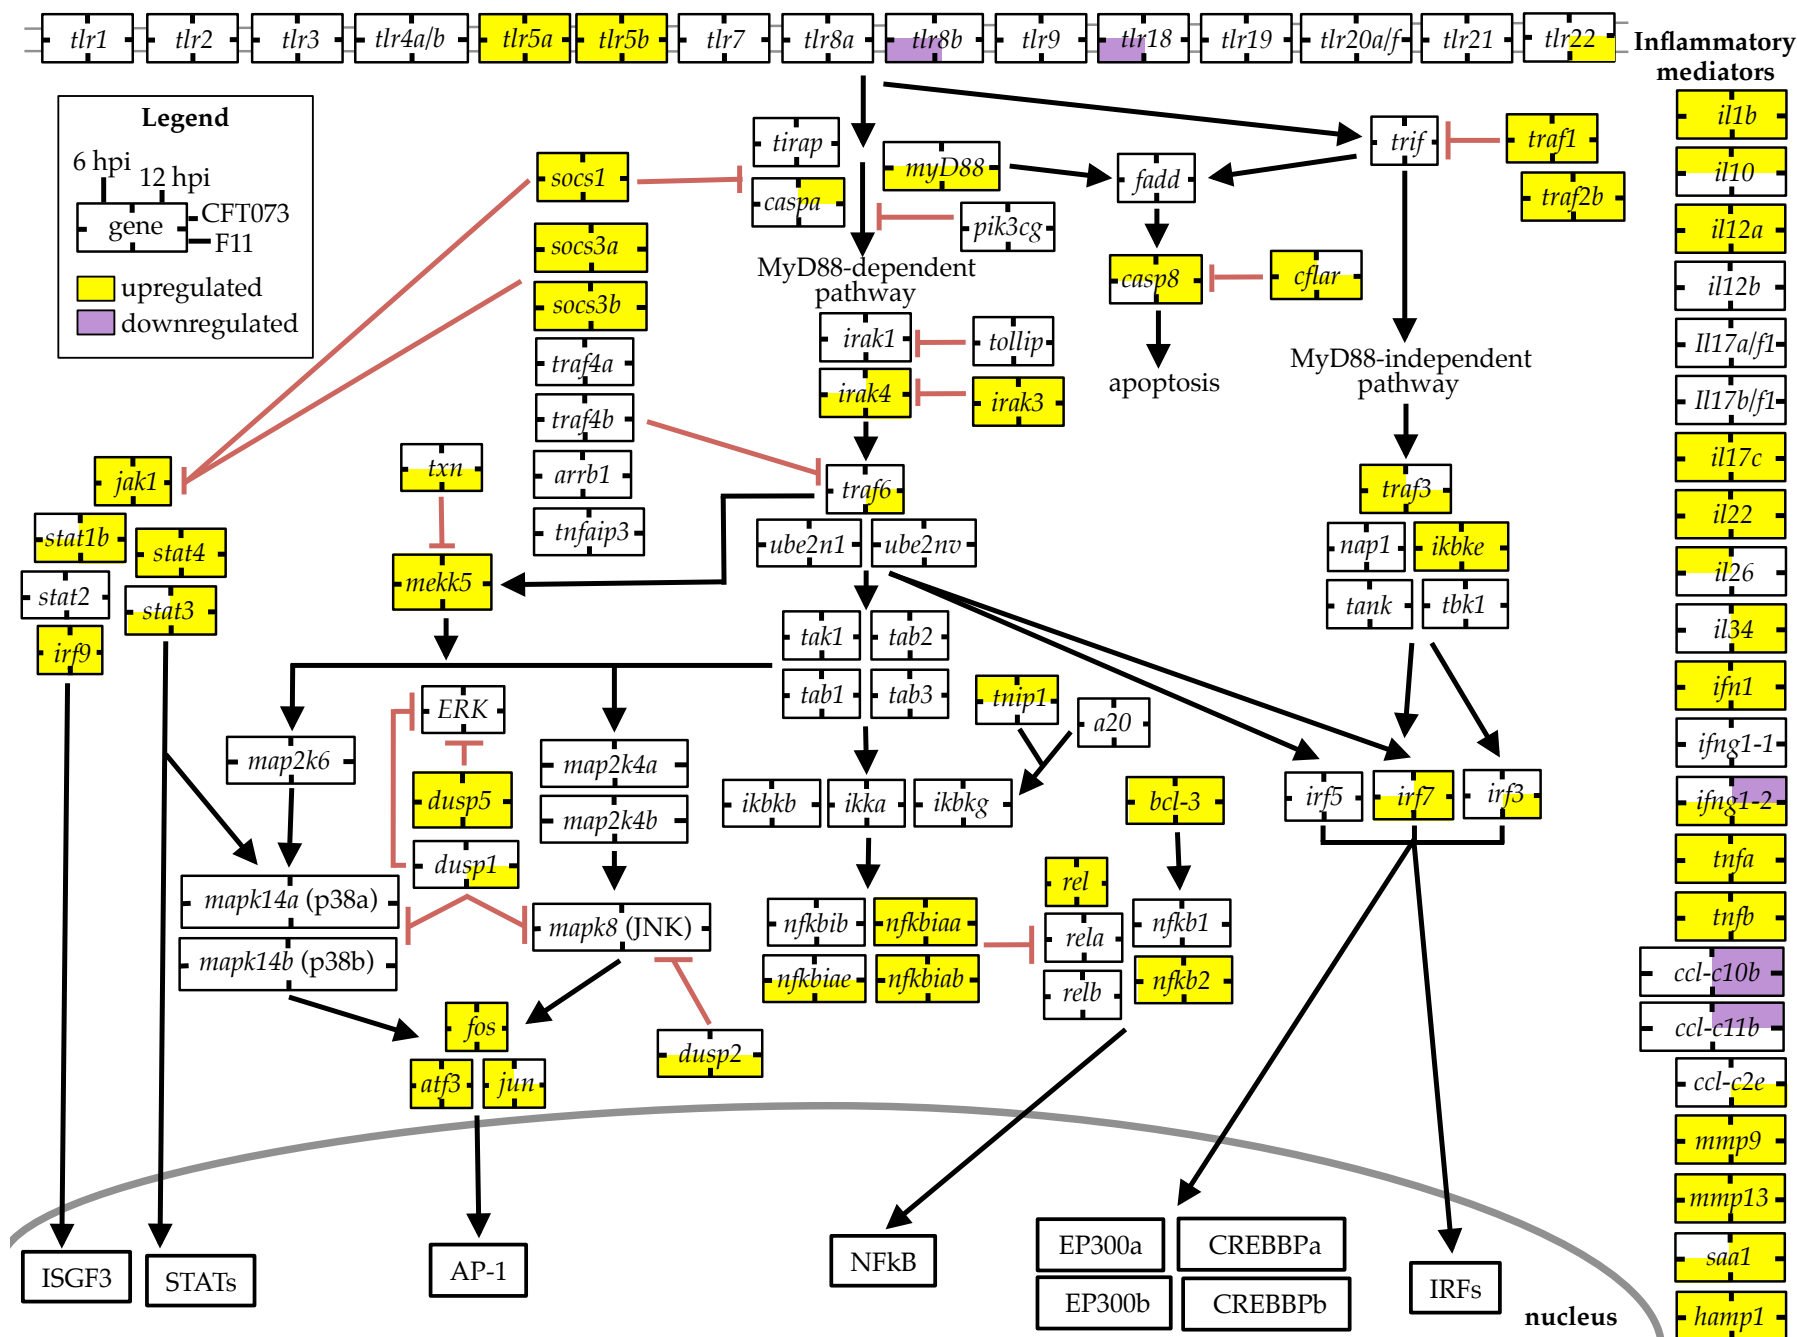

**Supplemental Figure S5. CFT073 and F11 have overlapping, but distinct, effects on the expression of TLR pathway genes and downstream inflammatory mediators.**

Diagram shows differentially expressed host genes at 6 and 12 hpi with CFT073 or F11. Upregulated genes are denoted in yellow, while those that are downregulated are purple (fold change up or down  $\geq 2.0$ ;  $P \leq 0.05$ ).
