# Supplementary material for: Similarly Lethal Strains of Extraintestinal Pathogenic Escherichia coli Trigger Markedly Diverse Host Responses in a Zebrafish Model of Sepsis
Source: PubMed Central journal article supplement (PMC4894679; doi:10.1128/msphere.00062-16), 2016-04-20
Supplement: sph002162069sf9.pdf [file sph002162069sf9.pdf]

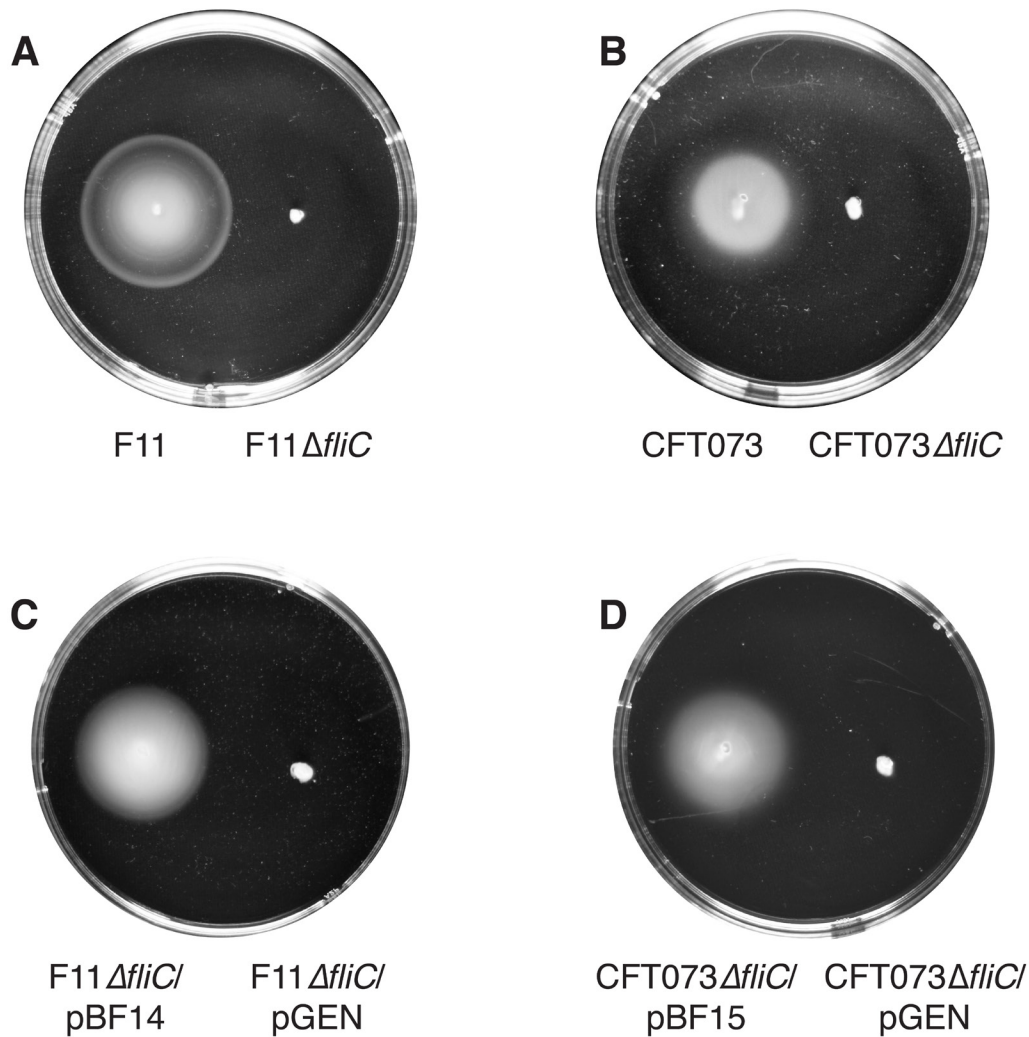

**Supplemental Figure S6. Functional verification and complementation of *fliC* mutants.**

(A-B) Deletion of *fliC* in F11 (A) and CFT073 (B) renders both pathogens immobile on 0.1% LB agar plates. Wild type strains are also pictured as controls.

(C) Complementation of F11Δ*fliC* with pBF14 restores motility on 0.1% LB agar plates, while the mutant carrying the empty vector pGEN-MCS (pGEN) remains immobile.

(D) Complementation of CFT073Δ*fliC* with pBF15 restores motility on 0.1% LB agar plates, while the mutant carrying the empty vector remains immobile.
