# Supplementary material for: Similarly Lethal Strains of Extraintestinal Pathogenic Escherichia coli Trigger Markedly Diverse Host Responses in a Zebrafish Model of Sepsis
Source: PubMed Central journal article supplement (PMC4894679; doi:10.1128/msphere.00062-16), 2016-04-20
Supplement: sph002162069st1.pdf [file sph002162069st1.pdf]

**Supplemental Table S1. Bacterial Strains and Plasmids.**

| <i>E. coli</i> Strain/Plasmid | Description                                                                   | Source or Reference |
|-------------------------------|-------------------------------------------------------------------------------|---------------------|
| Strains                       |                                                                               |                     |
| F11                           | Cystitis isolate (O6:K2:H31)                                                  | (1)                 |
| CFT073                        | Urosepsis isolate (O6:K2:H1)                                                  | (2)                 |
| UTI89                         | Cystitis isolate (O18:K1:H7)                                                  | (3)                 |
| 536                           | Pyelonephritis isolate (O6:K15:H31)                                           | (4)                 |
| RS218                         | Neonatal meningitis isolate (O18ac:K1:H7)                                     | (3, 5)              |
| EC958                         | UTI isolate (O25b:H4)                                                         | (6)                 |
| HS                            | Commensal gut isolate (O9:H4)                                                 | (7)                 |
| MG1655                        | K12 lab strain                                                                | (8)                 |
| NMEC1                         | Human neonatal meningitis isolate                                             | ARUP                |
| NMEC2                         | Human neonatal meningitis isolate                                             | ARUP                |
| BEC1                          | Human blood isolate                                                           | ARUP                |
| BEC2                          | Human blood isolate                                                           | ARUP                |
| BEC3                          | Human blood isolate                                                           | Weyrich lab         |
| BEC4                          | Human blood isolate                                                           | Weyrich lab         |
| BEC5                          | Human blood isolate                                                           | H. Crandall         |
| BEC6                          | Human blood isolate                                                           | H. Crandall         |
| BEC7                          | Human blood isolate                                                           | H. Crandall         |
| BEC8                          | Human blood isolate                                                           | H. Crandall         |
| BEC9                          | Human blood isolate                                                           | H. Crandall         |
| CFT073 $\Delta$ <i>fliC</i>   | CFT073 <i>fliC::kan</i>                                                       | This study          |
| F11 $\Delta$ <i>fliC</i>      | F11 <i>fliC::kan</i>                                                          | This study          |
| Plasmids                      |                                                                               |                     |
| <i>p</i> <i>fliC-lux</i>      | Encodes P <sub><i>fliC</i></sub> luciferase reporter, Amp <sup>R</sup>        | (9)                 |
| <i>p</i> KM208                | Encodes IPTG inducible lambda Red recombinase, Amp <sup>R</sup>               | (10)                |
| <i>p</i> GEN-MCS              | High-retention plasmid containing multiple-cloning site, Amp <sup>R</sup>     | (9)                 |
| <i>p</i> BF14                 | Carries <i>fliC</i> with native promoter region from F11, Amp <sup>R</sup>    | This study          |
| <i>p</i> BF15                 | Carries <i>fliC</i> with native promoter region from CFT073, Amp <sup>R</sup> | This study          |
