# Supplementary material for: Similarly Lethal Strains of Extraintestinal Pathogenic Escherichia coli Trigger Markedly Diverse Host Responses in a Zebrafish Model of Sepsis
Source: PubMed Central journal article supplement (PMC4894679; doi:10.1128/msphere.00062-16), 2016-04-20
Supplement: sph002162069st2.pdf [file sph002162069st2.pdf]

**Supplemental Table 2. Primers used in this study.**

| <b>qRT-PCR</b>                                           | <b>Sequence (5'-3')</b>                                        |
|----------------------------------------------------------|----------------------------------------------------------------|
| <b>zEF1<math>\alpha</math></b>                           |                                                                |
| Forward                                                  | TGAGCGTGGTATCACCATTG                                           |
| Reverse                                                  | CAACACCACCAGCAACAATC                                           |
| <b>zIL1<math>\beta</math></b>                            |                                                                |
| Forward                                                  | TGGACTTCGCAGCACAAAATG                                          |
| Reverse                                                  | CACTTCACGCTCTTGGATGA                                           |
| <b>zTNF<math>\alpha</math></b>                           |                                                                |
| Forward                                                  | AAGGAGAGTTGCCTTTACCG                                           |
| Reverse                                                  | ATTGCCCTGGGTCTTATGG                                            |
| <b>zSAA1</b>                                             |                                                                |
| Forward                                                  | GGA ACTATGAAGCTGCACAGCGG                                       |
| Reverse                                                  | CCTCTGCGAATGAGACCTTG                                           |
| <b>zHAMP</b>                                             |                                                                |
| Forward                                                  | TGCAGGAGAACCAACATCTG                                           |
| Reverse                                                  | AGCAGTATCCGCAGCCTTTA                                           |
| <b>zMMP9</b>                                             |                                                                |
| Forward                                                  | CATTAAGATGCCCTGATGTATCCC                                       |
| Reverse                                                  | AGTGGTGGTCCGTGGTTGAG                                           |
| <b>zIL10</b>                                             |                                                                |
| Forward                                                  | TCACGTCATGAACGAGATCC                                           |
| Reverse                                                  | CCTCTTGCAATTCACCATATCC                                         |
| <b>zIFN1</b>                                             |                                                                |
| Forward                                                  | TCTGCGTCTACTTGCGAATG                                           |
| Reverse                                                  | GGCTTGAAATGGTGTCTCC                                            |
| <b>zIL8</b>                                              |                                                                |
| Forward                                                  | TGTGTTATTGTTTTCTGGCATTTC                                       |
| Reverse                                                  | GCGACAGCGTGGATCTACAG                                           |
| <b>zIL17c</b>                                            |                                                                |
| Forward                                                  | GTCGGAGAGCAAAGTGGAAG                                           |
| Reverse                                                  | GCAGCCATCACACAAACT                                             |
| <b>zIL6</b>                                              |                                                                |
| Forward                                                  | TCCTCAAACCTTCAGACCGC                                           |
| Reverse                                                  | TCAGGACGCTGTAGATTCGC                                           |
| <b>Gene KO/confirmation plasmids</b>                     | <b>Sequence (5'-3')</b>                                        |
| <b>CFT073<math>\Delta</math><i>flic</i> Knock Out</b>    |                                                                |
| Forward                                                  | CGTAATCAACGACTTGCAATATAGGATAACGAATCTGTGTAGGCTGG<br>AGCTGCTTCG  |
| Reverse                                                  | GGCGTTGCCGTGAGTCTCAGTTAATCAGGTTACGGCGACATATGAAT<br>ATCCTCCTTAG |
| <b>CFT073<math>\Delta</math><i>flic</i> Confirmation</b> |                                                                |
| Forward                                                  | CGACAGACGATAACAGGGTTG                                          |
| Reverse                                                  | ATCCGGCCTACAAAAATGTG                                           |

**F11 $\Delta$ flic Knock Out**

Forward CGTAATCAACGACTTGCAATATAGGATAACGAATCTGTGTAGGCTGG  
AGCTGCTTCG

Reverse GCGGTTGCCGTCAGTCTCAGTTAATCAGGTTACAACGACATATGAATA  
TCCTCCTTAG

**F11 $\Delta$ flic Confirmation**

Forward CGACAGACGATAACAGGGTTG

Reverse CTTACCCGGCCTACAAAATG

**pBF14/pBF15**

Forward GATCGAAGCTTGTTATCGGCCTGAATTGCGC

Reverse GATTGCCATTGGTTAACCCCTGCAGCAGAGACAG

**pBF14/pBF15 Confirmation**

Forward GCACTGTCTCTGTTATTCAGG

Reverse CCAGCAGCAGTTACAAACTCAAG

---
